# Supplementary material for: Development of a fluidized bed reactor for phosphorus recovery from rubber industry wastewater through struvite formation: material selection and prototype
Source: Royal Society of Chemistry journal article supplement (doi:10.1039/d4ew00043a), 2024-01-01
Supplement: d4ew00043a1.pdf [file d4ew00043a1.pdf]

## Supporting Information

### Development of a Fluidized Bed Reactor for Phosphorus Recovery from Rubber Industry Wastewater through Struvite Formation: Material Selection and Prototype

Danai Maddewor <sup>a</sup>, Patiya Kemacheevakul <sup>a,b,\*</sup>, Nipaphan Phungsombun <sup>c</sup>, Pongsavat  
Savatdipap <sup>c</sup>, and Surawut Chuangchote <sup>b,d</sup>

<sup>a</sup> *Department of Environmental Engineering, Faculty of Engineering, King Mongkut's  
University of Technology Thonburi, 126 Prachauthit Rd., Bangmod, Thungkru, Bangkok  
10140, Thailand*

<sup>b</sup> *Research Center of Advanced Materials for Energy and Environmental Technology (MEET),  
King Mongkut's University of Technology Thonburi, 126 Prachauthit Rd., Bangmod,  
Thungkru, Bangkok 10140, Thailand*

<sup>c</sup> *Sahaviriyah Steel Industries (PCL), 28/1 Prapawit Building, Surasak Road, Silom, Bangrak,  
Bangkok 10500, Thailand*

<sup>d</sup> *Department of Tool and Materials Engineering, Faculty of Engineering, King Mongkut's  
University of Technology Thonburi, 126 Prachauthit Rd., Bangmod, Thungkru, Bangkok  
10140, Thailand*

**Table S.1** The characteristics of the synthetic treated rubber industry wastewater.

| Parameter           | Value         | Unit                                     | Difference (%)* |
|---------------------|---------------|------------------------------------------|-----------------|
| pH                  | 4.95±0.20     | -                                        | 2.97            |
| Reactive phosphorus | 193.80±5.27   | mg/L as PO <sub>4</sub> <sup>3-</sup> -P | 3.14            |
| Ammonium            | 1746.02±12.88 | mg/L as NH <sub>4</sub> -N               | 2.42            |
| Magnesium           | 99.75±0.01    | mg/L as Mg                               | 1.37            |
| Calcium             | 34.70±0.00    | mg/L as Ca                               | 1.70            |

\*The value of synthetic wastewater which was different from the value of actual wastewater (%).

**Table S.2** The arithmetic average roughness (Ra) of the materials investigated by AFM.

| Material                        | Ra (nm) *           |
|---------------------------------|---------------------|
| Stainless steel                 | $0.0555 \pm 0.0191$ |
| Acrylic                         | $0.0168 \pm 0.0010$ |
| Epoxy resin fiberglass          | $0.3105 \pm 0.0685$ |
| Vinyl ester resin<br>fiberglass | $0.3483 \pm 0.0637$ |
| Aluminium                       | $0.1403 \pm 0.0153$ |
| Galvanized steel                | $0.2810 \pm 0.0333$ |

\* The testing distance from AFM analysis was 10  $\mu\text{m}$ .

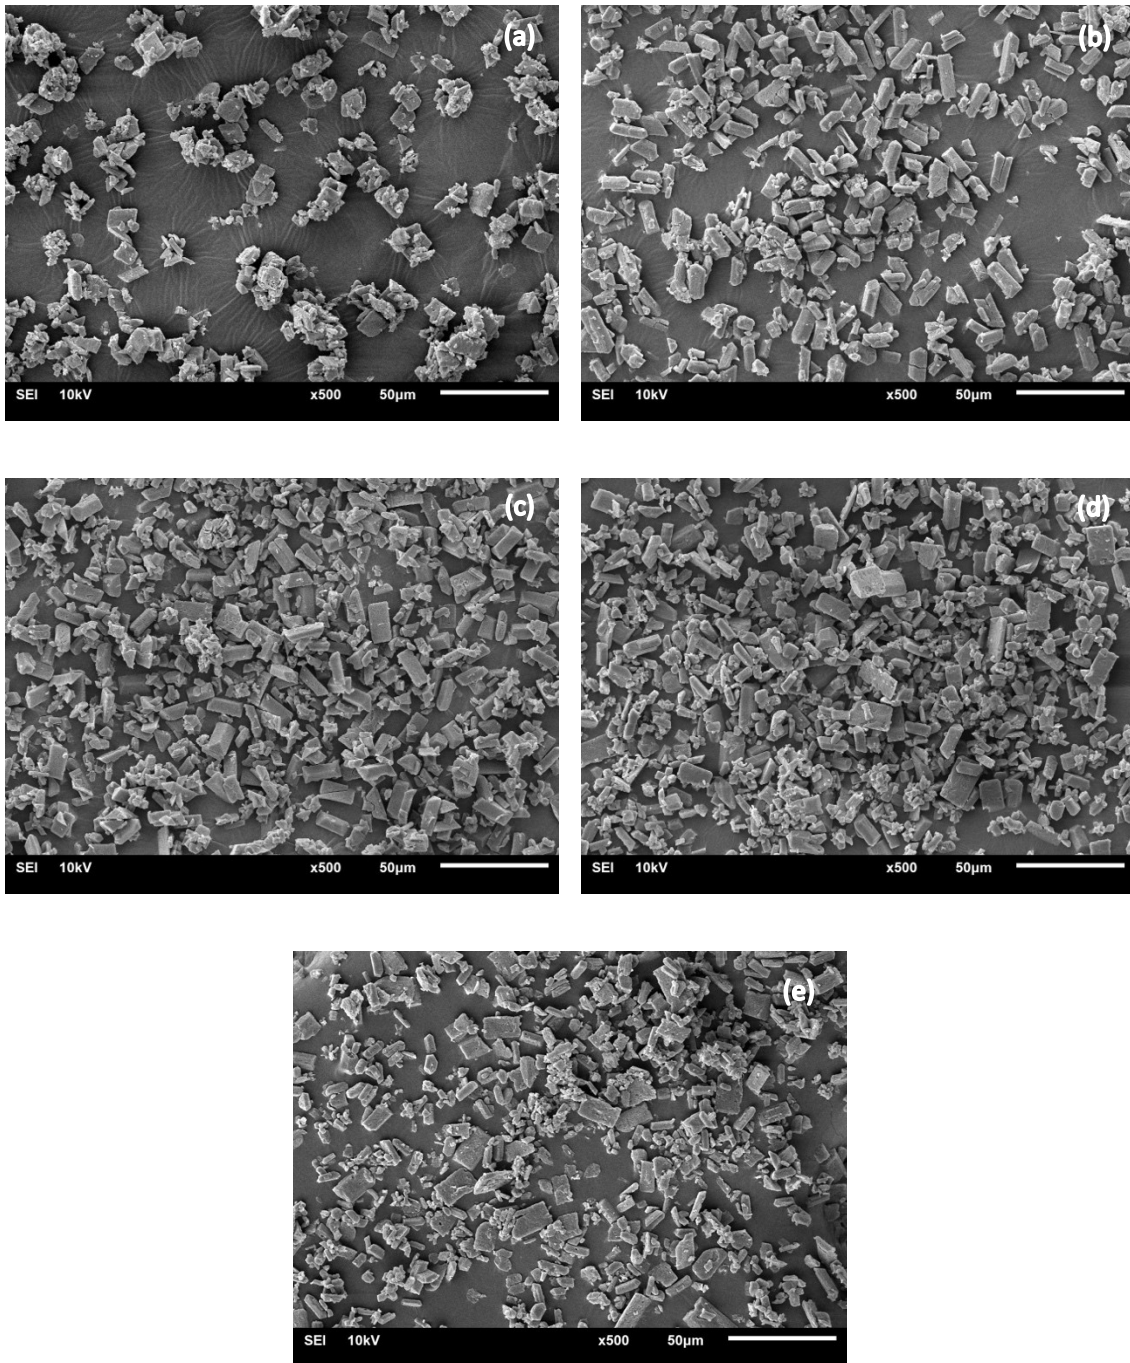

**Figure S1.** SEM images (500x) of struvite crystals from treated rubber industry wastewater at different pH values: (a) pH 7.5, (b) pH 8, (c) pH 8.5, (d) pH 9, and (e) pH 9.5.

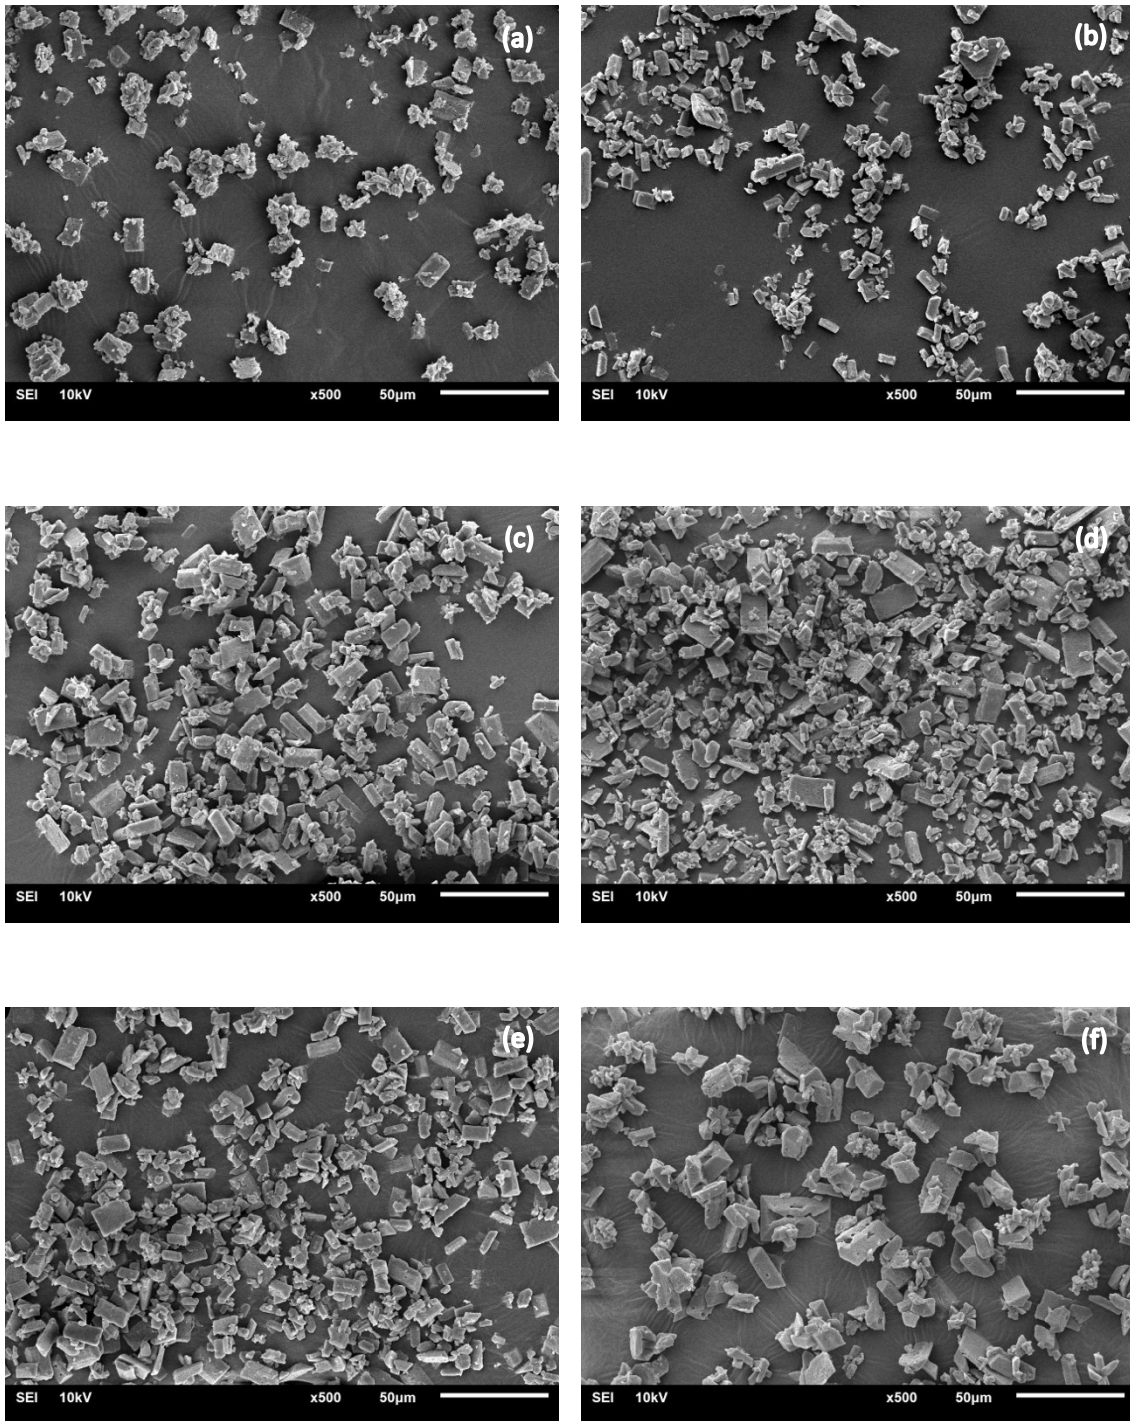

**Figure S2.** SEM images (500x) of struvite crystals from treated rubber industry wastewater at different Mg:P molar ratios: (a) 0.66:1, (b) 1.0:1, (c) 1.1:1, (d) 1.2:1, (e) 1.3:1, and (f) 1.5:1.

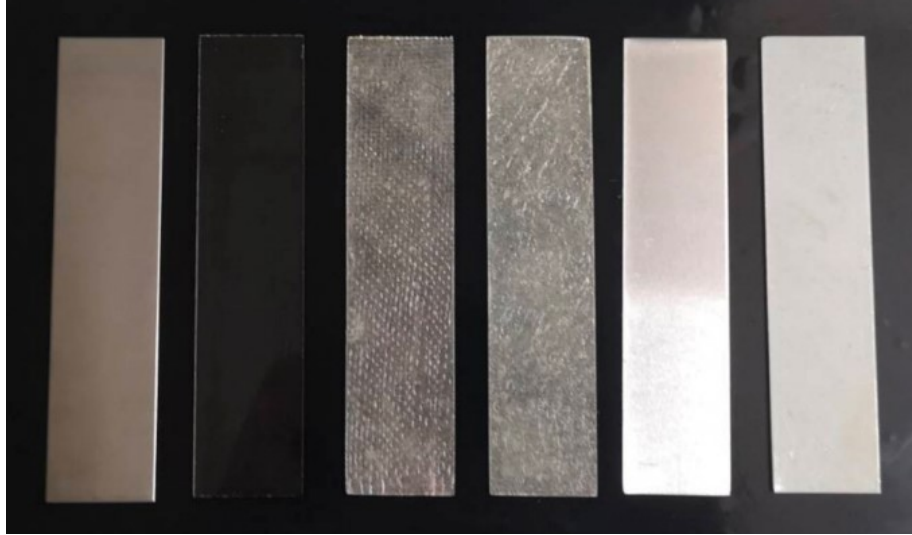

**Figure S3.** Materials before testing: stainless steel, acrylic, epoxy resin fiberglass, vinyl ester resin fiberglass, aluminum, and galvanized steel (left to right).

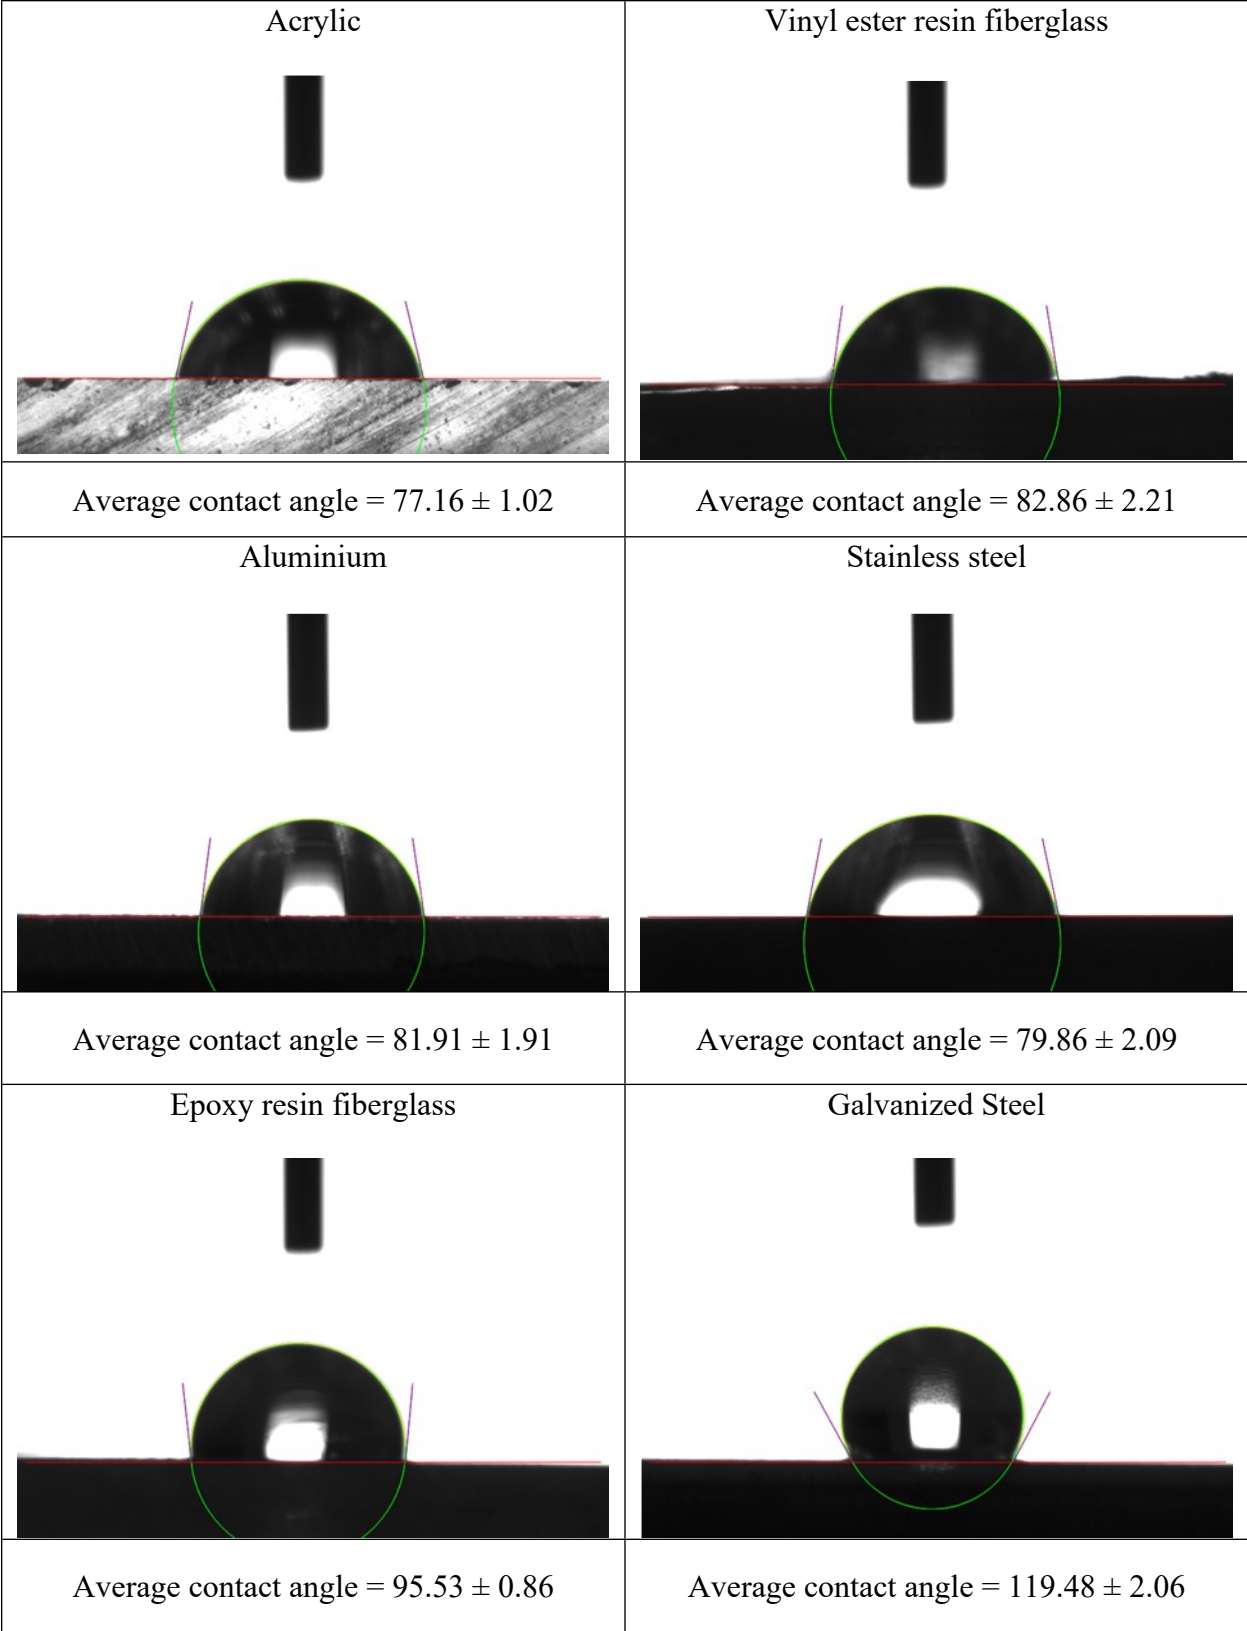

**Figure S4.** Contact angle images and average contact angle values of various materials.

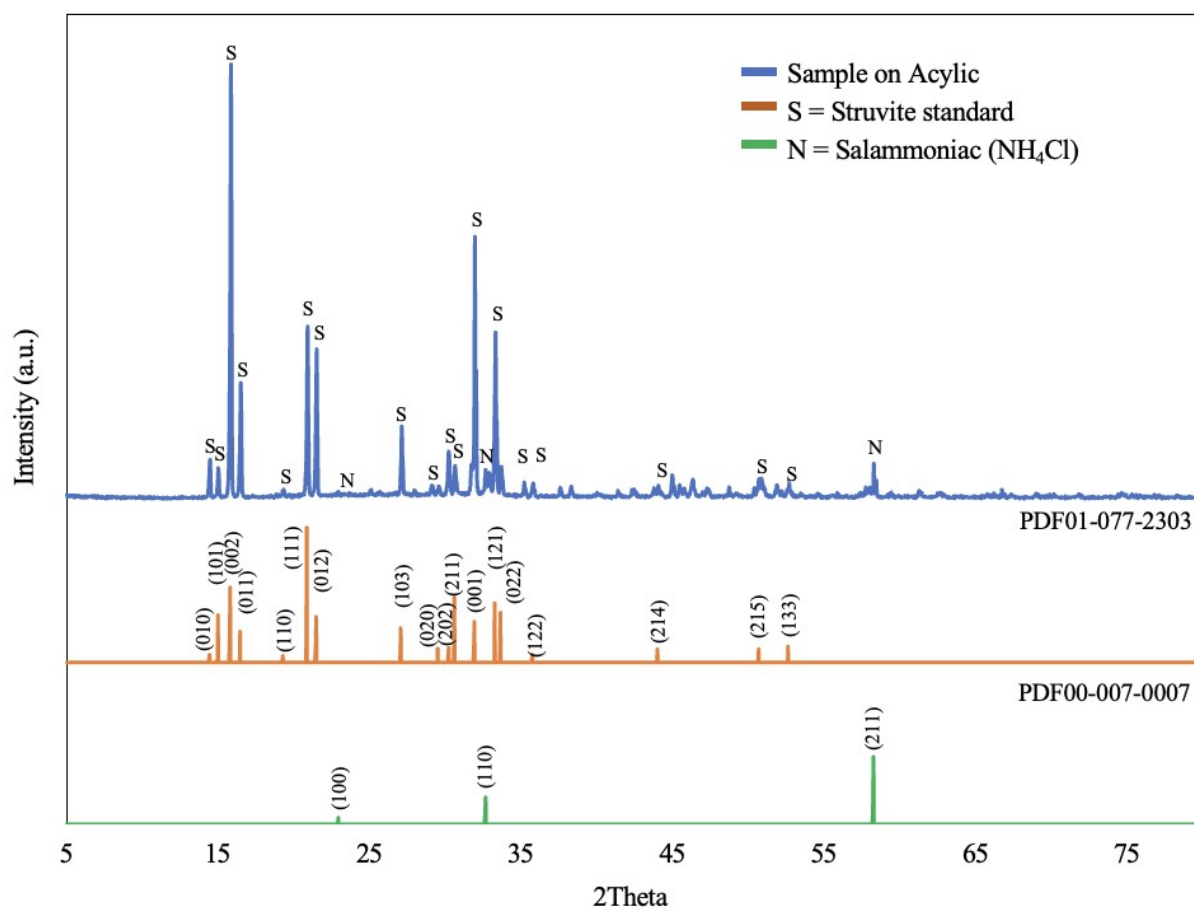

**Figure S5.** XRD patterns of scales on acrylic.



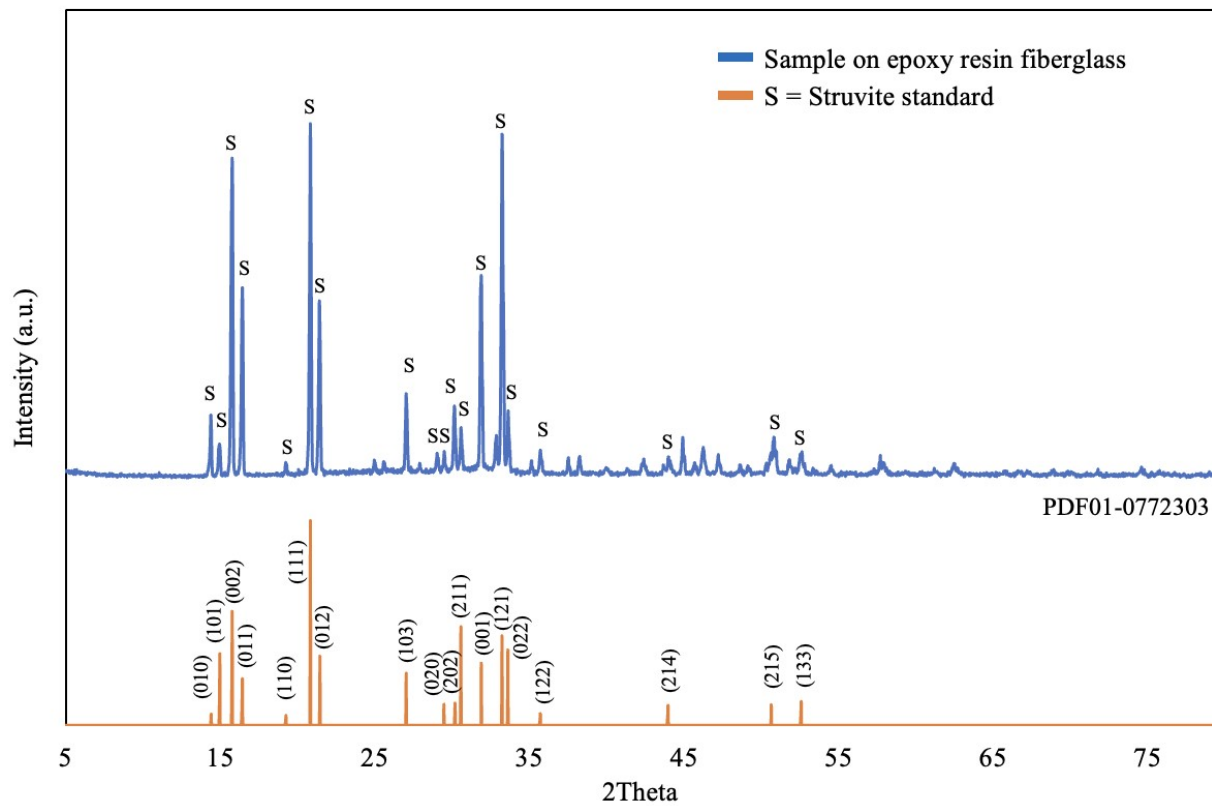

**Figure S6.** XRD patterns of scales on epoxy resin fiberglass.

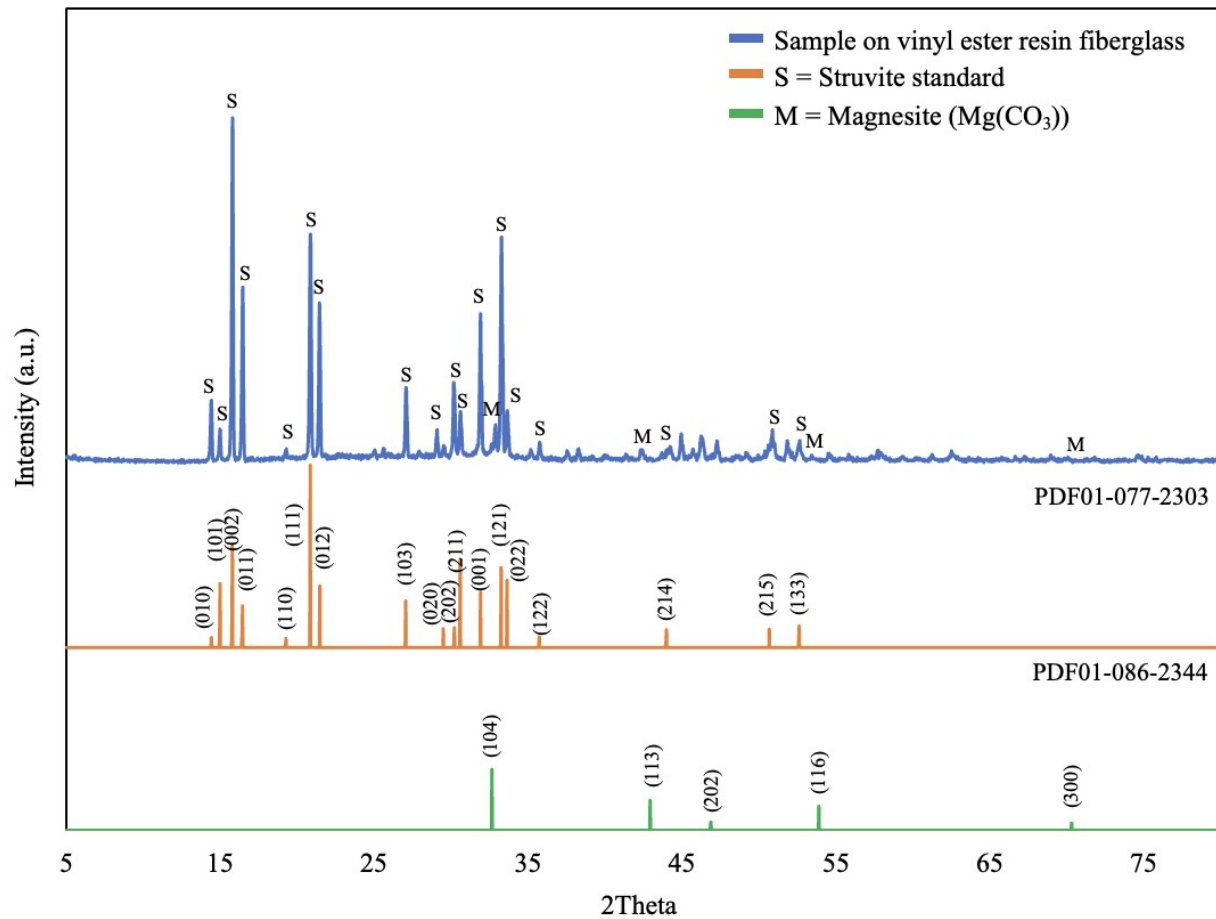

**Figure S7.** XRD patterns of scales on vinyl ester resin fiberglass.

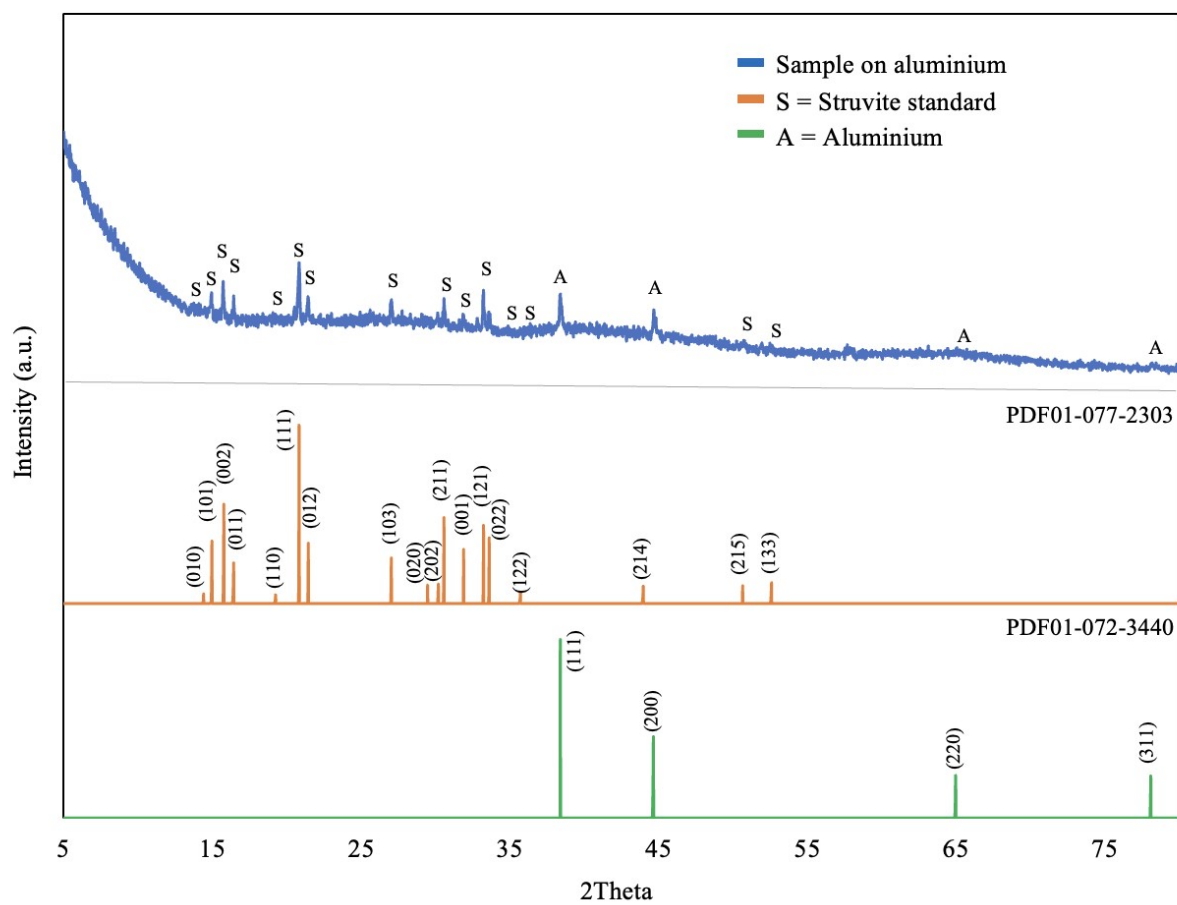

Figure S8. XRD patterns of scales on aluminium.

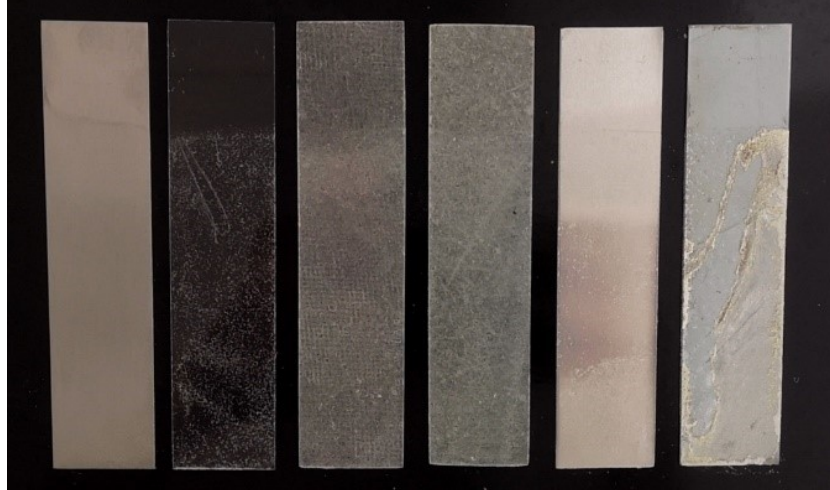

**Figure S9.** Materials after testing at 24 h: stainless steel, acrylic, epoxy resin fiberglass, vinyl ester resin fiberglass, aluminum, and galvanized steel (left to right).

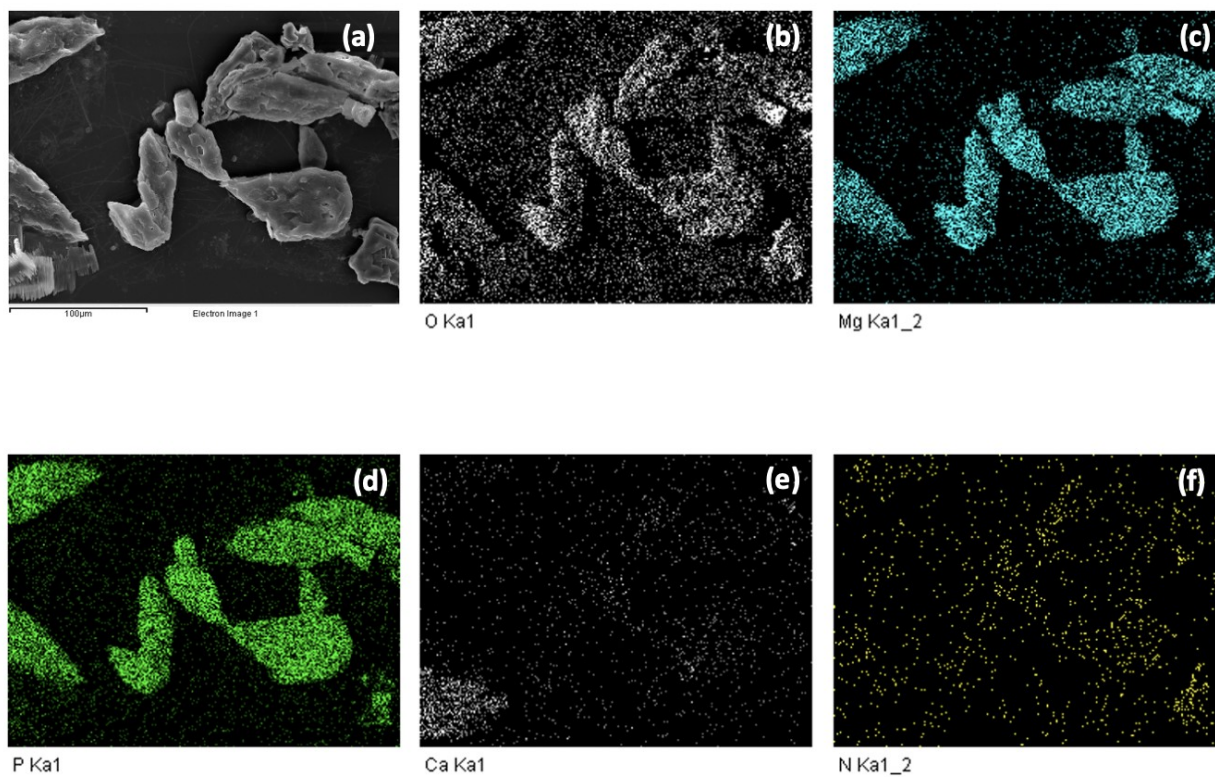

**Figure S10.** Energy-dispersive X-ray spectroscopy (EDS) mapping images of scales on acrylic, including (a) SEM image, (b) O element, (c) Mg element, (d) P element, (e) Ca element, and (f) N element.

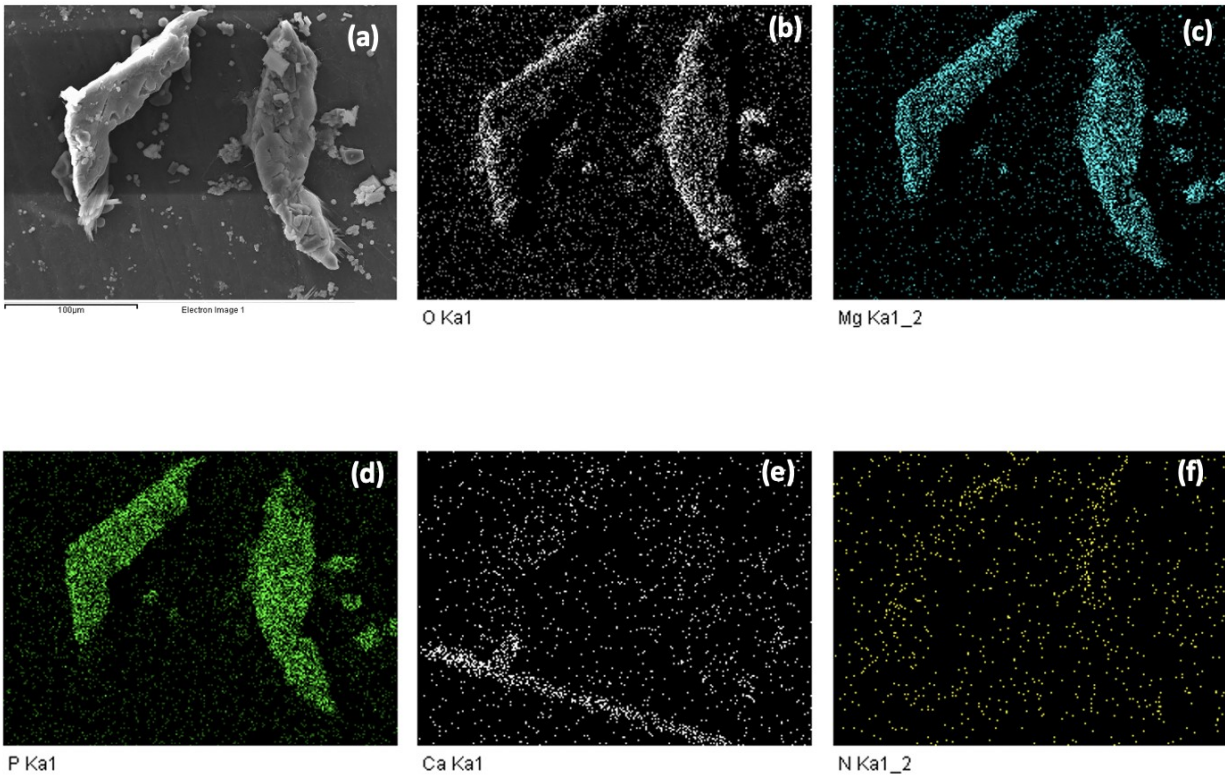

**Figure S11.** Energy-dispersive X-ray spectroscopy (EDS) mapping images of scales on epoxy resin fiberglass, including (a) SEM image, (b) O element, (c) Mg element, (d) P element, (e) Ca element, and (f) N element.

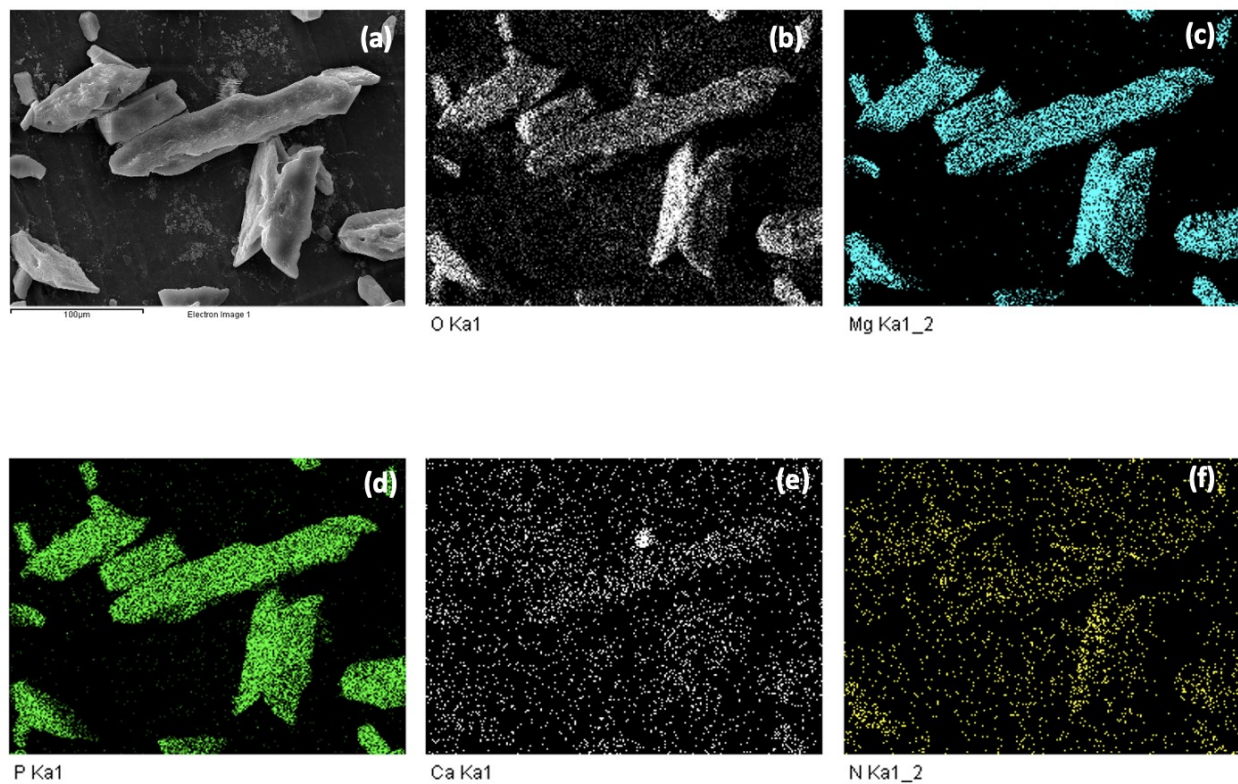

**Figure S12.** Energy-dispersive X-ray spectroscopy (EDS) mapping images of scales on vinyl ester resin fiberglass, including (a) SEM image, (b) O element, (c) Mg element, (d) P element, (e) Ca element, and (f) N element.

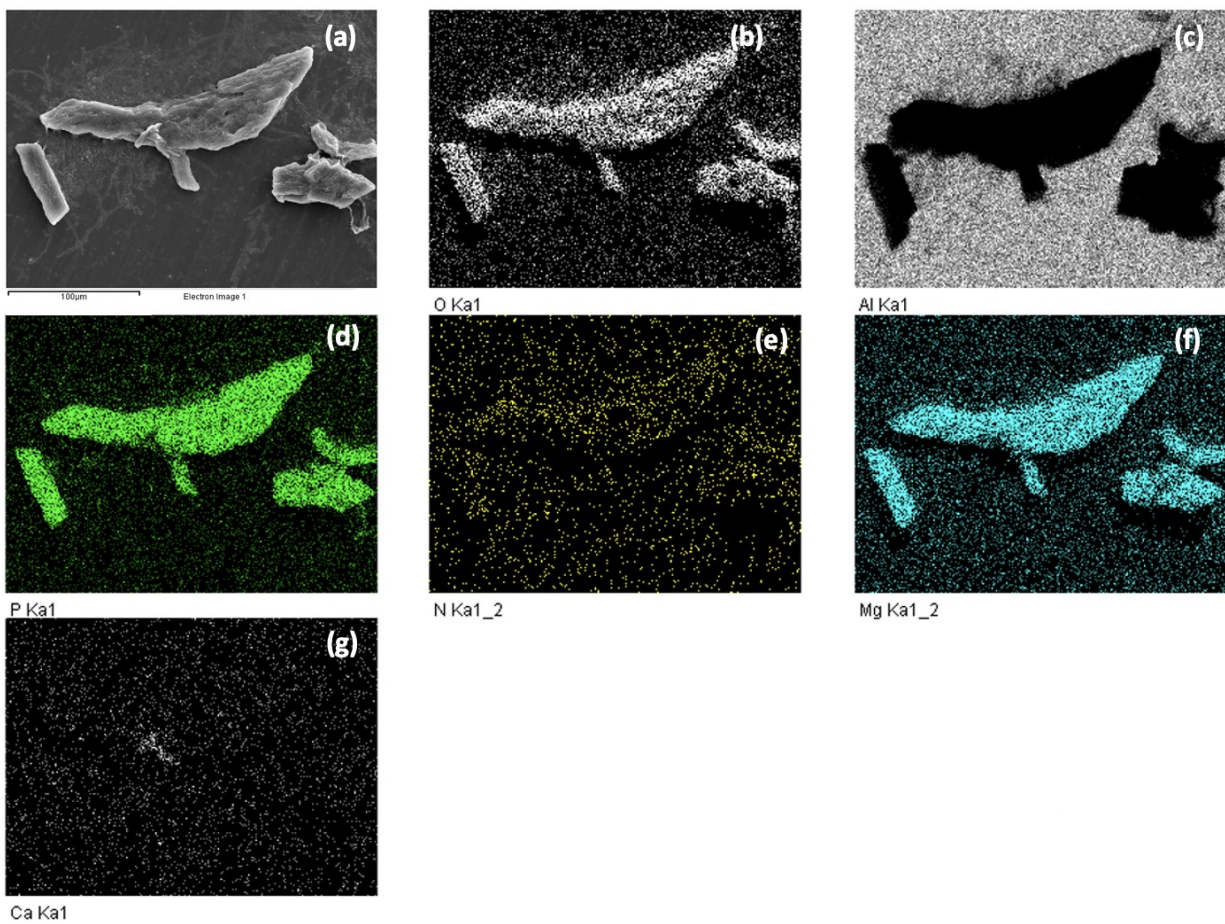

**Figure S13.** Energy-dispersive X-ray spectroscopy (EDS) mapping images of scales on aluminum, including (a) SEM image, (b) O element, (c) Al element, (d) P element, (e) N element, (f) Mg element, (g) Ca element.



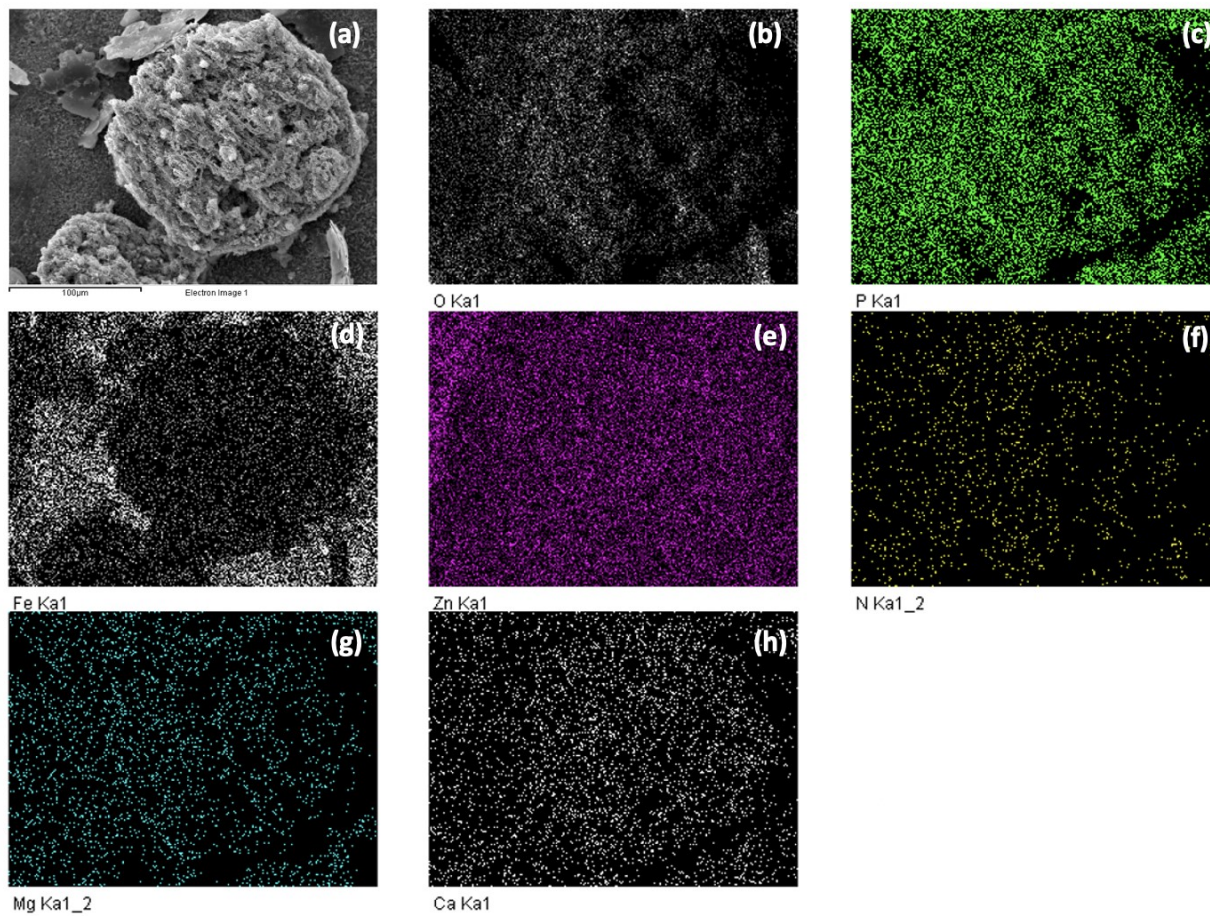

**Figure S14.** Energy-dispersive X-ray spectroscopy (EDS) mapping images of scales on galvanized steel, including (a) SEM image, (b) O element, (c) P element, (d) Fe element, (e) Zn element, (f) N element, (g) Mg element, and (h) Ca element.
